# Supplementary material
Source: MDPI journal article supplement (https://www.mdpi.com/2312-7481/8/11/142)
Supplement: s1 [file s1]

Archive with 1 entries (1 files):
- magnetochemistry-1993765-supplementary.pdf
